# Supplementary material for: Mapping groundwater dependent ecosystems using a high-resolution global groundwater model
Source: Copernicus journal article supplement (doi:10.5194/hess-2024-112), 2024-05-06
Supplement: Supplementary file 1 [file hess-2024-112-supplement.pdf]

# Mapping groundwater dependent ecosystems using a high-resolution global groundwater model

Nicole Gyakowah Otoo<sup>1</sup>, Edwin H. Sutanudjaja<sup>1</sup>, Michelle T. H. van Vliet<sup>1</sup>, Aafke M. Schipper<sup>2,3</sup>,  
Marc F. P. Bierkens<sup>1,4</sup>

<sup>1</sup>Department of Physical Geography, Utrecht University, The Netherlands

5 <sup>2</sup>Radboud University, Radboud Institute for Biological and Environmental Sciences (RIBES), Nijmegen, The Netherlands

<sup>3</sup>PBL Netherlands Environmental Assessment Agency, The Hague, The Netherlands

<sup>4</sup>Unit Subsurface & Groundwater Systems, Deltares, Utrecht, the Netherlands

*Correspondence to:* Nicole Gyakowah Otoo (n.g.otoo@uu.nl)

## Supplementary Information

10

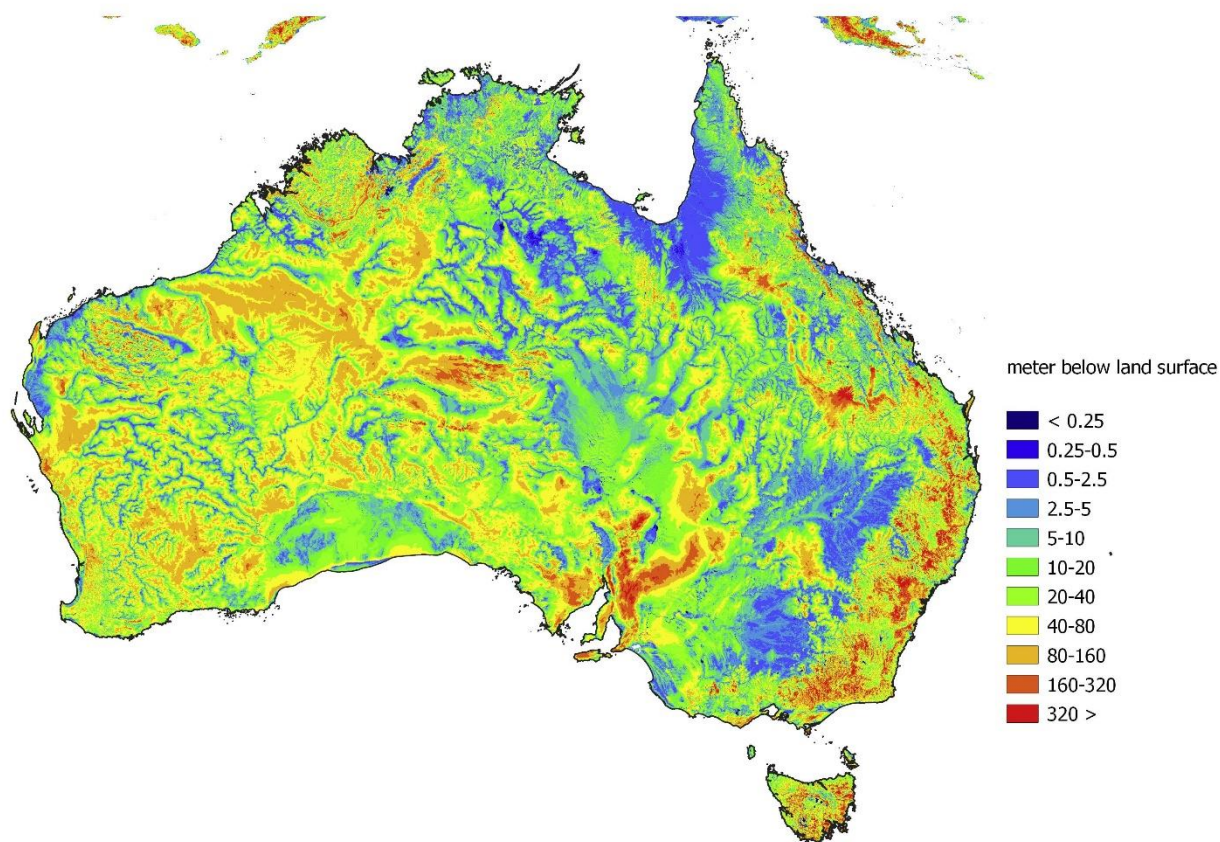

Figure S1. Average simulated groundwater levels for 1979 – 2019.

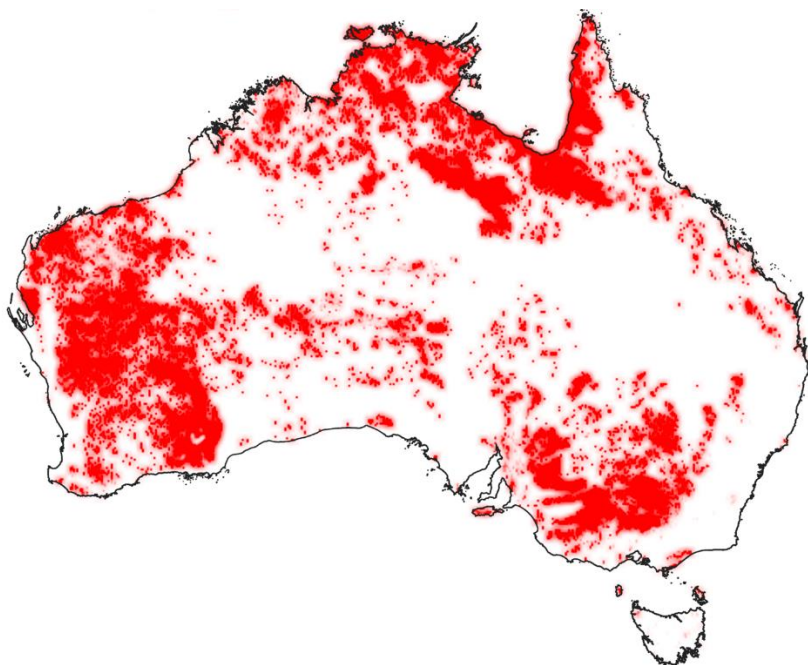

20 **Figure S2. Locations (red) where groundwater seepage occurs from the lower model layer towards the upper layer of the groundwater model.**

kD=00.10,bed-cond=05.00,deklaag-  
vcond=02.00,sto\_coef=00.20

kD=00.10,bed-cond=05.00,deklaag-  
vcond=02.00,sto\_coef=00.50

kD=00.10,bed-cond=05.00,deklaag-  
vcond=02.00,sto\_coef=01.00 (DEFAULT)

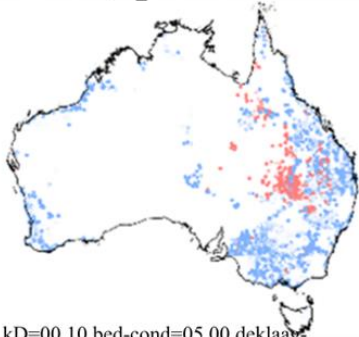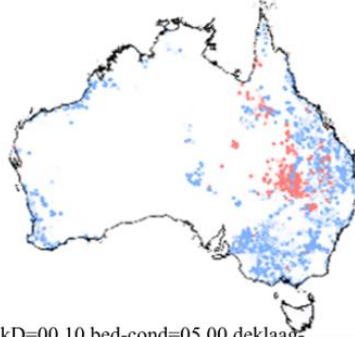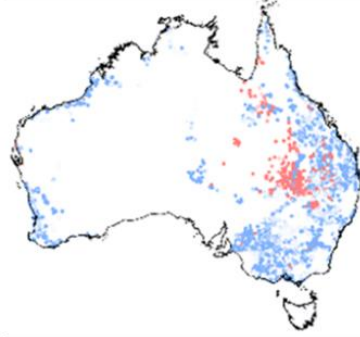

kD=00.10,bed-cond=05.00,deklaag-  
vcond=02.00,sto\_coef=02.00

kD=00.10,bed-cond=05.00,deklaag-  
vcond=02.00,sto\_coef=01.50

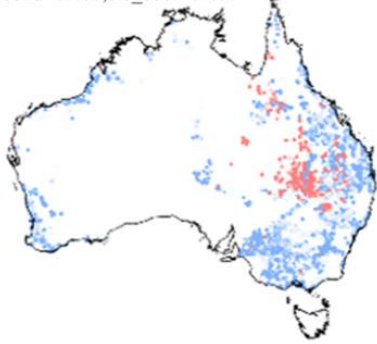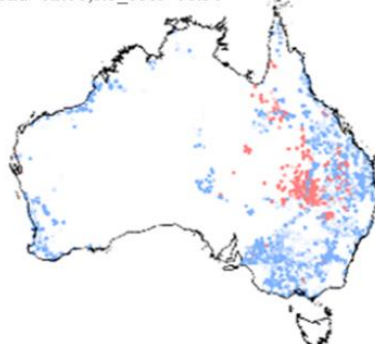

25 **Figure S3. Bias of observed groundwater depths against simulated groundwater depth from pre factor global parameter sets . kD = transmissivity, bed-cond= river bed conductance, deklaag-vcond = thickness of the vertical confining layer and sto\_coef = storage coefficient**

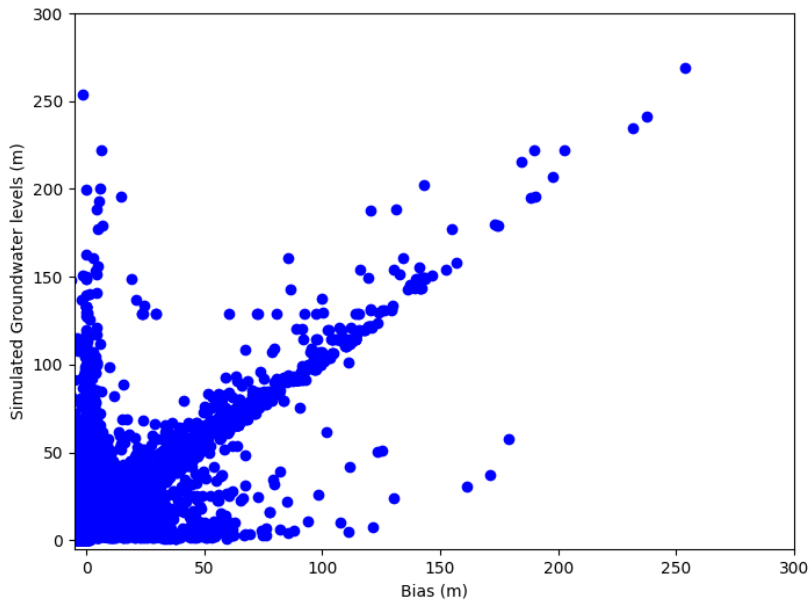

30

**Figure S4. Scatter plot of bias of simulated groundwater depth (m) against the mean observed groundwater depth (m).**

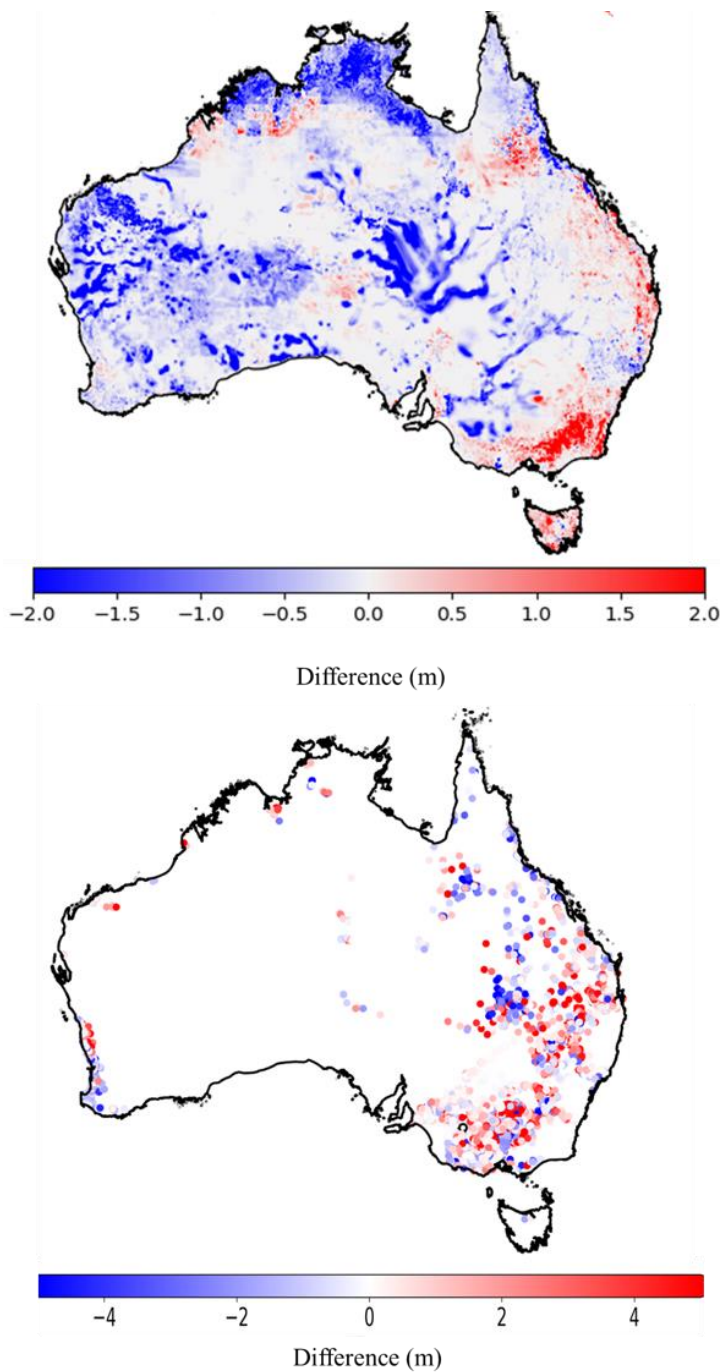

35

**Figure S5. Differences below surface level (m) in average simulated (top) and observed (bottom) groundwater depths between 1979-2000 and 2001-2019. Red areas indicate a decline in groundwater levels and blue areas indicate areas with an increase in groundwater levels. White areas in bottom figure are locations with no well data.**

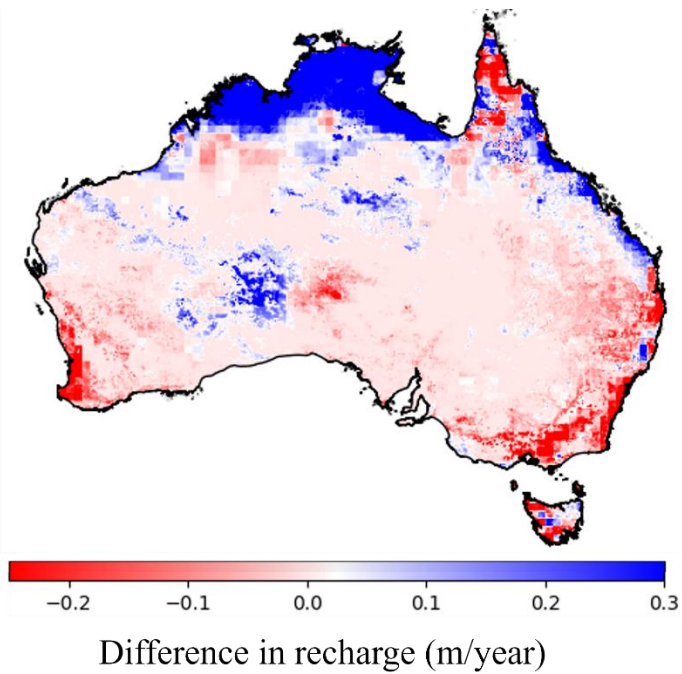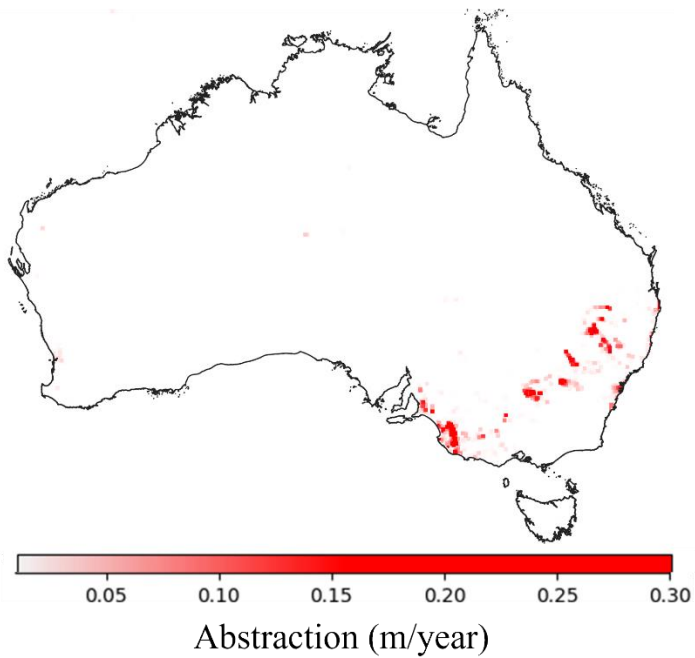

40

Figure S6 : Changes between simulated groundwater recharge and between period 2001-2019 relative 1979-2000 and average abstraction rates over 2001-2019.
